# Supplementary material
Source: PubMed Central journal article supplement (PMC3370934)
Supplement: bbug-3-157-s01.pdf [file bbug-3-157-s01.pdf]

Supplementary Material to:

**Identification of iron-regulated genes of *Bifidobacterium breve* UCC2003 as a basis for controlled gene expression**

Michelle Cronin, Aldert Zomer, Gerald Fitzgerald and Douwe van Sinderen  
Bioengineered Bugs 2012 ; 3(3): In Press. DOI: 10.4161/bbug.3.3.18985

**Table S1.** Gram-positive bacterial pathogens iron uptake systems

| Organism                | Transporter                              | Function                                                  | Reference |
|-------------------------|------------------------------------------|-----------------------------------------------------------|-----------|
| <i>S. aureus</i>        | Staphyloferrin a                         | Siderophore, (transferrin)                                | 62 63     |
|                         | Staphyloferrin b                         | Siderophore (unknown)                                     | 64        |
|                         | Aurochelin                               | Siderophore (unknown)                                     | 65        |
|                         | FhuABC                                   | ABC transporter (ferrichrome uptake)                      | 66 67 68  |
|                         | SirABC                                   | ABC transporter (unknown)                                 | 69        |
|                         | SstABCD                                  | ABC transporter (unknown)                                 | 70        |
|                         | SitABC                                   | ABC transporter (unknown)                                 | 71        |
|                         | Glyceraldehyde 3 phosphate dehydrogenase | Transferrin receptor                                      | 72        |
|                         | IsdE                                     | Heme                                                      | 73        |
| <i>S. pyogenes</i>      | FeoB                                     | Transmembrane transporter                                 | 74        |
|                         | SiuADG                                   | ABC transporter                                           | 75        |
|                         | MtsABC                                   | ABC transporter (multi-metal transporter)                 | 76        |
| <i>S. pneumoniae</i>    | SiaABC                                   | ABC transporter (Heme)                                    | 77        |
|                         | PiaABCD                                  | ABC transporter                                           | 78        |
|                         | PiuBCDA                                  | ABC transporter                                           | 78        |
| <i>B. anthracis</i>     | PitADBC                                  | ABC transporter                                           | 79        |
|                         | IsdX1 & IsdX2,                           | Heme transport                                            | 80        |
| <i>C. diphtheriae</i>   | ciuABCD                                  | ABC transporter (siderophore)                             | 81        |
|                         | HmuTUV                                   | ABC transporter (Haemin & haemoglobin)                    | 82        |
|                         | HmuO                                     | Haem oxygenase                                            | 83        |
| <i>L. monocytogenes</i> | FhuCBDG                                  | Heterologous siderophore (ferric hydroxymate transporter) | 84        |
|                         | FeoAB                                    | Uptake of ferrous iron                                    | 84        |
|                         | hupDGC                                   | ABC transporter (Haemin/haemoglobin)                      | 84        |
| <i>M. tuberculosis</i>  | irtAB                                    | Transporter of Fe-carboxymycobactin                       | 85        |

**References Cited in Table S1**

62. Meiwes J, Fiedler HP, Haag H, Zahner H, Konetschny-Rapp S, Jung G. Isolation and characterization of staphyloferrin A, a compound with siderophore activity from *Staphylococcus hyicus* DSM 20459. *FEMS Microbiol Lett* 1990; 55:201-5.
63. Cotton JL, Tao J, Balibar CJ. Identification and characterization of the *Staphylococcus aureus* gene cluster coding for staphyloferrin A. *Biochemistry* 2009; 48:1025-35.
64. Haag H, Fiedler HP, Meiwes J, Drechsel H, Jung G, Zahner H. Isolation and biological characterization of staphyloferrin B, a compound with siderophore activity from staphylococci. *FEMS Microbiol Lett* 1994; 115:125-30.
65. Courcol RJ, Trivier D, Bissinger MC, Martin GR, Brown MR. Siderophore production by *Staphylococcus aureus* and identification of iron-regulated proteins. *Infect Immun* 1997; 65:1944-8.

66. Sebulsky MT, Hohnstein D, Hunter MD, Heinrichs DE. Identification and characterization of a membrane permease involved in iron-hydroxamate transport in *Staphylococcus aureus*. *J Bacteriol* 2000; 182:4394-400.
67. Cabrera G, Xiong A, Uebel M, Singh VK, Jayaswal RK. Molecular characterization of the iron-hydroxamate uptake system in *Staphylococcus aureus*. *Appl Environ Microbiol* 2001; 67:1001-3.
68. Dale SE, Doherty-Kirby A, Lajoie G, Heinrichs DE. Role of siderophore biosynthesis in virulence of *Staphylococcus aureus*: identification and characterization of genes involved in production of a siderophore. *Infect Immun* 2004; 72:29-37.
69. Heinrichs JH, Gatlin LE, Kunsch C, Choi GH, Hanson MS. Identification and characterization of SirA, an iron-regulated protein from *Staphylococcus aureus*. *J Bacteriol* 1999; 181:1436-43.
70. Morrissey JA, Cockayne A, Hill PJ, Williams P. Molecular cloning and analysis of a putative siderophore ABC transporter from *Staphylococcus aureus*. *Infect Immun* 2000; 68:6281-8.
71. Cockayne A, Hill PJ, Powell NB, Bishop K, Sims C, Williams P. Molecular cloning of a 32-kilodalton lipoprotein component of a novel iron-regulated *Staphylococcus epidermidis* ABC transporter. *Infect Immun* 1998; 66:3767-74.
72. Modun B, Williams P. The staphylococcal transferrin-binding protein is a cell wall glyceraldehyde-3-phosphate dehydrogenase. *Infect Immun* 1999; 67:1086-92.
73. Muryoi N, Tiedemann MT, Pluym M, Cheung J, Heinrichs DE, Stillman MJ. Demonstration of the iron-regulated surface determinant (Isd) heme transfer pathway in *Staphylococcus aureus*. *J Biol Chem* 2008; 283:28125-36.
74. Cartron ML, Maddocks S, Gillingham P, Craven CJ, Andrews SC. Feo--transport of ferrous iron into bacteria. *Biometals* 2006; 19:143-57.
75. Smoot LM, Smoot JC, Graham MR, Somerville GA, Sturdevant DE, Migliaccio CA, et al. Global differential gene expression in response to growth temperature alteration in group A *Streptococcus*. *Proc Natl Acad Sci U S A* 2001; 98:10416-21.
76. Bates CS, Toukoki C, Neely MN, Eichenbaum Z. Characterization of MtsR, a new metal regulator in group A streptococcus, involved in iron acquisition and virulence. *Infect Immun* 2005; 73:5743-53.
77. Gupta R, Shah P, Swiatlo E. Differential gene expression in *Streptococcus pneumoniae* in response to various iron sources. *Microb Pathog* 2009; 47:101-9.
78. Brown JS, Gilliland SM, Holden DW. A *Streptococcus pneumoniae* pathogenicity island encoding an ABC transporter involved in iron uptake and virulence. *Mol Microbiol* 2001; 40:572-85.
79. Brown JS, Gilliland SM, Ruiz-Albert J, Holden DW. Characterization of pit, a *Streptococcus pneumoniae* iron uptake ABC transporter. *Infect Immun* 2002; 70:4389-98.
80. Fabian M, Solomaha E, Olson JS, Maresso AW. Heme transfer to the bacterial cell envelope occurs via a secreted hemophore in the gram-positive pathogen *Bacillus anthracis*. *J Biol Chem* 2009.
81. Kunkle CA, Schmitt MP. Analysis of a DtxR-regulated iron transport and siderophore biosynthesis gene cluster in *Corynebacterium diphtheriae*. *J Bacteriol* 2005; 187:422-33.
82. Drazek ES, Hammack CA, Schmitt MP. *Corynebacterium diphtheriae* genes required for acquisition of iron from haemin and haemoglobin are homologous to ABC haemin transporters. *Mol Microbiol* 2000; 36:68-84.
83. Chu GC, Katakura K, Zhang X, Yoshida T, Ikeda-Saito M. Heme degradation as catalyzed by a recombinant bacterial heme oxygenase (Hmu O) from *Corynebacterium diphtheriae*. *J Biol Chem* 1999; 274:21319-25.
84. Jin B, Newton SM, Shao Y, Jiang X, Charbit A, Klebba PE. Iron acquisition systems for ferric hydroxamates, haemin and haemoglobin in *Listeria monocytogenes*. *Mol Microbiol* 2006; 59:1185-98.
85. Rodriguez GM. Control of iron metabolism in *Mycobacterium tuberculosis*. *Trends Microbiol* 2006; 14:320-7.

Figure S1. Cluster consensus alignment of FTR1 homologs from *B. breve*, *B. longum*, *T. denticola*, *E. coli*, *Campylobacter jejuni*, *Bacillus subtilis*, *Listeria monocytogenes*, *Streptococcus thermophilus*, *Mycobacterium smegmatis* and *Saccharomyces cerevisiae*.

See next page.

# Supplementary Figure 1

```

.....|.....|.....|.....|.....|.....|.....|.....|.....|.....|
      10      20      30      40      50      60      70      80
B. breve      -----MVRRA CQSAELNTI REHDTIVADS FARAMOVDAE HQQSSEFISAR
B. longum     -----MVRRA QALRSV-----
T. denticola  -----
E. coli       MHVRNFRNSL LVTFLGLFIS MSVWASTN-Y APLIEDIEQR LDKTAELYQQ QHAEARRTV QMAYFEVFN LEGPFRINIS
C. jejuni     --MKIFK--L LPLITSLFIS SSAPARVDDY INEAKLTKDM LKQSIETYYK GDNIGAKKLS EDAYFQHFEN MEGPFRGNIG
B. subtilis   -----
L. monocytogenes -----
S. thermophilus -----M LVLLAWRKEA TLVKHSLKKD LVLGLLALF WTYPVAESY SDLYKITA TTAVQNKDQA
M. smegmatis  -----
S. cerevisiae -----
Clustal Consensu -----

```

```

.....|.....|.....|.....|.....|.....|.....|.....|.....|.....|
      90      100     110     120     130     140     150     160
B. breve      AMAAVVFLFA LIAATFLPAA VIPQSAPADP PCATVVTAAD KTDTSQVEYT TWADVSKAIE AQLQAGAKRY KSCNT-----
B. longum     VLAIVFLFA KVIATVADAV TAP-MAFADS STS----SSS SSSSSVSDYA TWAEVSKAMD KQLNSGLKTY KCGNT-----
T. denticola  -----
E. coli       ARKSYEMESA FGEIRRMIGE KKLADYQAR LDKLKAALRE VEPVLGGHR LVAEELQNAL SRDDIAVHWQ ES-----
C. jejuni     -RKAITMRK FVNLRMYKD KAPLITQNAL LDSIYYIDLR VAPLQNGYR LKAGASITNY DKAKARKSSI KANAKRQADA
B. subtilis   --GLALITFS LKLVFG-- SAHAARDFP TAALITQNKQ MTKSVKDCDM DSAQQTDTTF -----
L. monocytogenes LIGRFMLLS VLAVVLCVNF SETFAAEKPK LDKPKALEQ TETAVALDY FKAKEAFQED -----
S. thermophilus KAKELVALIK TDFETKENHD SKAGKVSKA LDKGDTSEE DLTSISSALL KFEKQNPVD LDAEKEKLET HFN-----
M. smegmatis  -----
S. cerevisiae -----
Clustal Consensu -----

```

```

.....|.....|.....|.....|.....|.....|.....|.....|.....|.....|
      170     180     190     200     210     220     230     240
B. breve      -----AGS TSAFMSAYNT IYASNPFAV
B. longum     -----AGA TSDFMGAYNK IYVASNPFAV
T. denticola  -----
E. coli       -----
C. jejuni     KALTAQMGCV DKKDLAQSSI TTTQASTPANN DTPSKLTDINA GTDIQAAAAM DARIQPTLGN ISTKFSQAAK APKKKNYQAS
B. subtilis   -----
L. monocytogenes -----
S. thermophilus -----
M. smegmatis  -----
S. cerevisiae -----
Clustal Consensu -----

```

```

.....|.....|.....|.....|.....|.....|.....|.....|.....|.....|
      250     260     270     280     290     300     310     320
B. breve      VRDTISSDKQ TAQQQAFQDI QNLSYTAGND DQLCQKIDAL SADL-DATAQ QLDANTQLAK PKQYKENLQK QIAKE----
B. longum     VHDITGADKQ LAQQQAFQSV QNLSYTPSND DQLAQKIDAL TADL-DATAQ QLDNTADLAK PKAYEALQA QIAKE----
T. denticola  -----
E. coli       SQHVQARVYQ GEKNSMEMMS LRQNRSAKDA ASINQQFSSL LALTAQPDHL N-DVSYQVIT LQDIEELIF GLPTTRDUQQ
C. jejuni     KDFLNDALFS DYRNTKVRTI VKKPTKAGND QKTQQATRTI TRQNDAKTD FKGLRDGLGN TRFQFDFVFI QTPNS----
B. subtilis   -----K AKWKEEFSI KKENLSSHSE MDANIAMISL SFINQDARKL KIQLEELASH LETYQAVVL KKTSS----
L. monocytogenes -----K LKWSENKQVV KEKSYDLAQQ IDRQIABISL GILNNDKQQA MDGITSLSHLN LKTYQEGTYT DKE-----
S. thermophilus RRTYGELKNA WTRNEAVVRD HSTAYYKIE TAISLSSSI ETEPTDFTSI QSSYDDLKGG IDDFIKGVPL DSTSS----
M. smegmatis  -----
S. cerevisiae -----MPNKV FNVAVFVVF RECLEAVIVI SVILSPKQA IGHDRALYR KIRIQ----
Clustal Consensu -----

```

```

.....|.....|.....|.....|.....|.....|.....|.....|.....|.....|
      330     340     350     360     370     380     390     400
B. breve      ---RKELDAK KRRTKN-TAK QNKDVADAML PILDNAYKAY EGGDAAKGAT LVNDAYYQHY EKLGFERTVL SAISGNRVSQ
B. longum     ---RKELDAK KKNPKGNR SWKDVANEMT PILDNAYKAY EKGDGAKGAT LVNNAYYQY EKLGFERNVM NAISGNRVSQ
T. denticola  ---KEDLST----- -WTKIVEKME IELNAYELY TQGTREAYD EVNAAVFRYY ESKGMKCTM SYLSGARKTA
E. coli       VAAAQSAUN: PAADRGNRRY DWAEVITGIN QSIQCAIARY QGGDAKNAII DIDDYDFRF EASGMEN-KI GSRDSAPKTT
C. jejuni     ---ELSSLQI SGFNDETRKR DYARVSNDR LALDGLKNY DGFAS-IVD DLGGIYLDIF EASGMEN-KI GAVDSGLKLL
B. subtilis   -----G QSRASLTAYI QSLKDTKQFI EKKQLDEASS AIDNLTSWL AVESGVVSQS KEAYTCHQN
L. monocytogenes -----G NTNITLSSYI AKLTATKKLI DEKEWAKAST QIQDLKTEWL AVESGVVSQS QAAVNTDRD
S. thermophilus -----S LTKLYGI KLEKALSQF QAGDEKATA SMKKFITWP TIEDDVSTIN PSLYAS----
M. smegmatis  -----
S. cerevisiae -----VWGVVILGPI ICAACAGPI GAYYSQKD IEGSARDIWE GIPCMIAITM ISMMGIPMR
Clustal Consensu -----

```
